# Supplementary material for: Crystallization-enhanced emission through hydrogen-bond interactions in blends containing hydroxyl-functionalized azine and poly(4-vinyl pyridine)
Source: Royal Society of Chemistry journal article supplement (doi:10.1039/c4tc00005f), 2014-01-01
Supplement: c4tc00005f1.pdf [file c4tc00005f1.pdf]

## Supporting Information

### **Crystallization-enhanced emission through hydrogen-bond interactions in blends containing hydroxyl-functionalized azine and poly(4-vinyl pyridine)**

*Tai-Shen Hsiao, Shiang-Lin Deng, Ke-Ying Shih and Jin-Long Hong\**

*Department of Materials and Optoelectronic Science, National Sun Yat-Sen*

*University, Kaohsiung 804214, Taiwan*

### **1,2-bis(2,4-dihydroxybenzylidene)hydrazine (CN4OH)**

To a solution of 2,4-dihydroxybenzaldehyde (1 g, 7.24 mmol) in ethanol (50 mL), hydrazine hydrate (0.21 g, 3.45 mmol) was added dropwise with vigorous stirring at room temperature. After the addition, the stirred mixture was allowed to react at room temperature overnight. The precipitate was then filtered and washed with ethanol three times (3 x 50 mL). After drying final product was obtained as yellow solid (0.7g, 75 % yield) <sup>1</sup>H NMR (500 MHz, d<sub>6</sub>-DMSO): δ 6.32 (d, 2H, H<sub>f</sub>), 6.4 (dd, 2H, H<sub>e</sub>), 7.41 (d, 2H, H<sub>d</sub>), 8.76 (s, 2H, H<sub>c</sub>), 10.18 (s, 2H, H<sub>b</sub>), 11.38 (s, 2H, H<sub>a</sub>) (Figure S1). <sup>13</sup>C NMR (500 MHz, d<sub>6</sub>-DMSO) δ 103.0 (C<sub>g</sub>), 108.8 (C<sub>f</sub>), 110.8 (C<sub>e</sub>), 133.6 (C<sub>d</sub>), 161.5 (C<sub>c</sub>), 162.6 (C<sub>b</sub>), 162.9 (C<sub>a</sub>) (Figure S2). MS m/e: calcd for C<sub>14</sub>H<sub>12</sub>N<sub>2</sub>O<sub>4</sub>, 272.08; found, 273.086 (M<sup>+</sup>). Anal. Calcd for C<sub>14</sub>H<sub>12</sub>N<sub>2</sub>O<sub>4</sub>: C, 61.76; H, 4.44; N, 10.29; O, 23.51. Found: C, 61.53; H, 4.80; N, 10.25; O, 23.42.

### **1,2-bis(2-hydroxybenzylidene)hydrazine (CN2OH)**

To a solution of 2-hydroxybenzaldehyde (1 g, 8.2 mmol) in ethanol (50 mL), hydrazine hydrate (0.24 g, 3.9 mmol) was slowly added with vigorous stirring at room temperature. The mixtures were then stirred overnight and the resulting precipitates were filtered. The resulting yellow solid was further washed by ethanol three times (3 x 50 mL). After drying, final product (0.72 g, 77% yield) was obtained. <sup>1</sup>H NMR (500

MHz, CDCl<sub>3</sub>) δ 6.96 (t, 2H, H<sub>f</sub>), 7.04 (d, 2H, H<sub>e</sub>), 7.36 (t, 2H, H<sub>d</sub>), 7.41 (d, 2H, H<sub>c</sub>), 8.71 (s, 2H, H<sub>b</sub>), 11.37 (s, 2H, H<sub>a</sub>) (Figure S3). <sup>13</sup>C NMR (500 MHz, CDCl<sub>3</sub>) δ 117.7 (C<sub>g</sub>), 117.9 (C<sub>f</sub>), 120.8 (C<sub>e</sub>), 133.2 (C<sub>d</sub>), 133.4 (C<sub>c</sub>), 160.6 (C<sub>b</sub>), 165.5 (C<sub>a</sub>) (Figure S4). MS m/e: calcd for C<sub>14</sub>H<sub>12</sub>N<sub>2</sub>O<sub>2</sub>, 240.09; found, 241.097 (M<sup>+</sup>). Anal. Calcd for C<sub>14</sub>H<sub>12</sub>N<sub>2</sub>O<sub>2</sub>: C, 69.99; H, 5.03; N, 11.66; O, 13.32. Found: C, 69.70; H, 5.43; N, 11.61; O, 13.26.

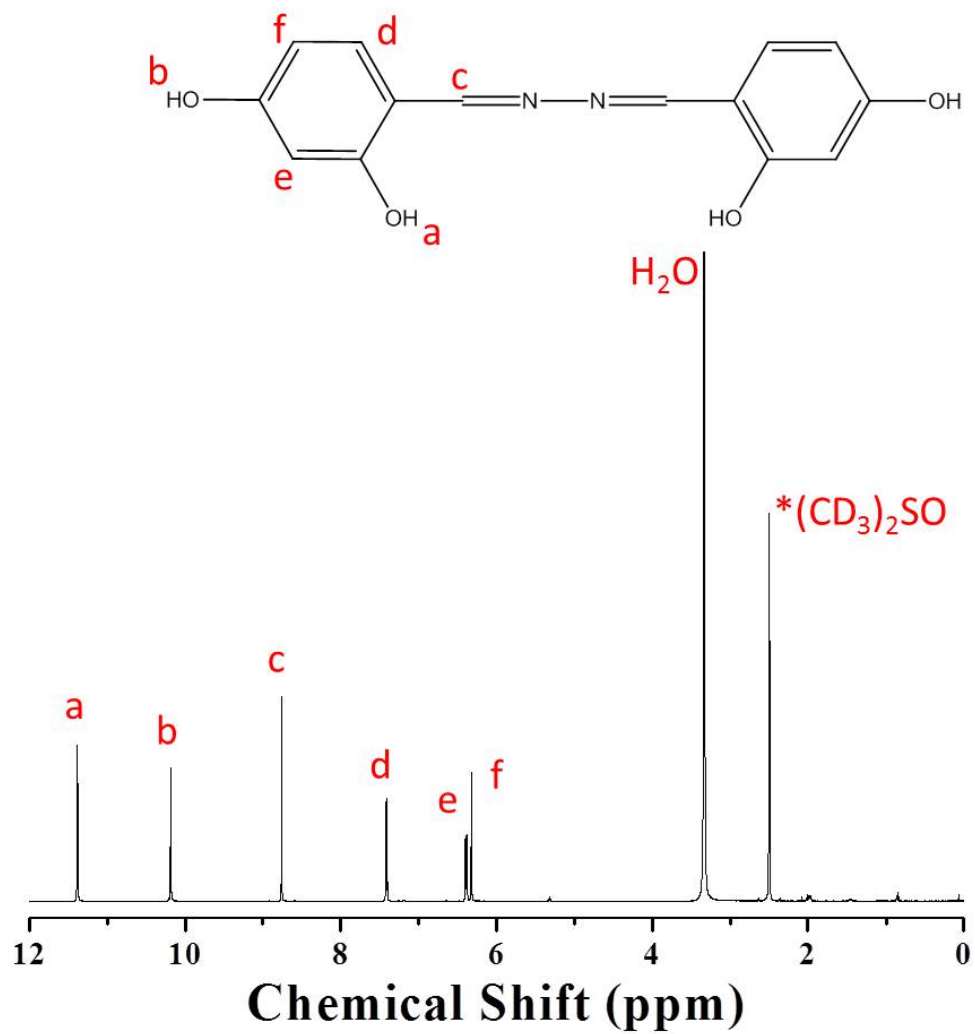

**Figure S1** <sup>1</sup>H NMR of CN4OH (d<sub>6</sub>-DMSO).

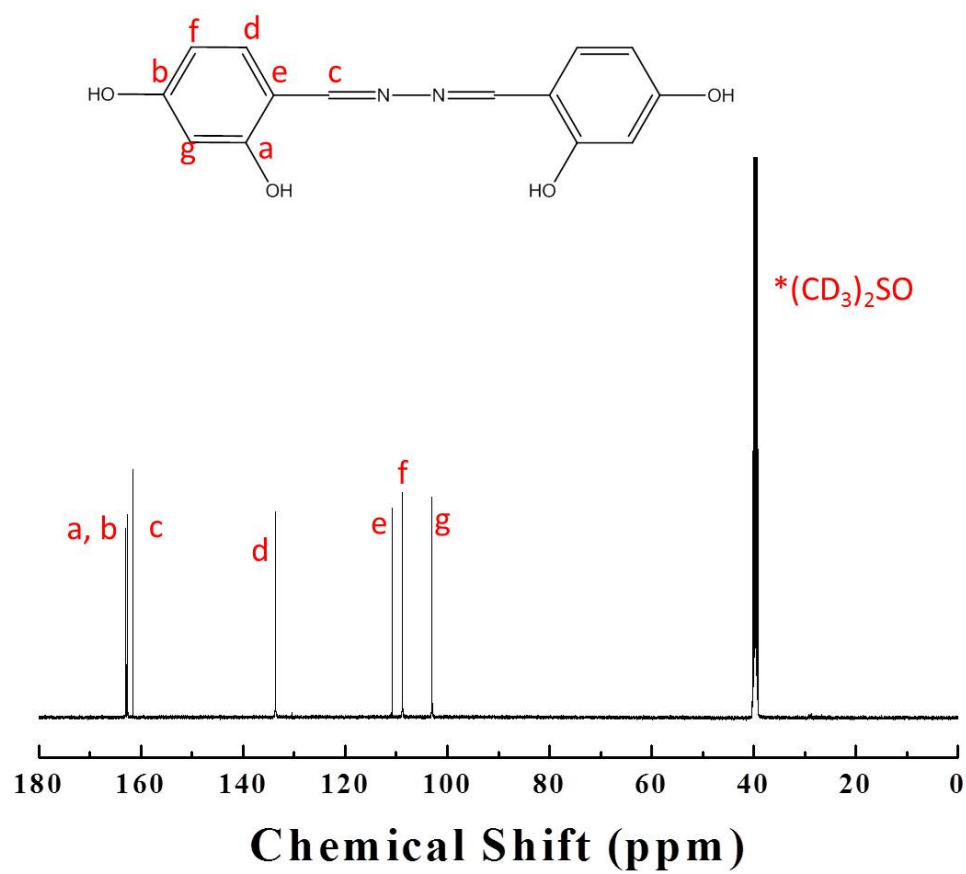

**Figure S2**  $^{13}\text{C}$  NMR of CN4OH ( $d_6$ -DMSO).

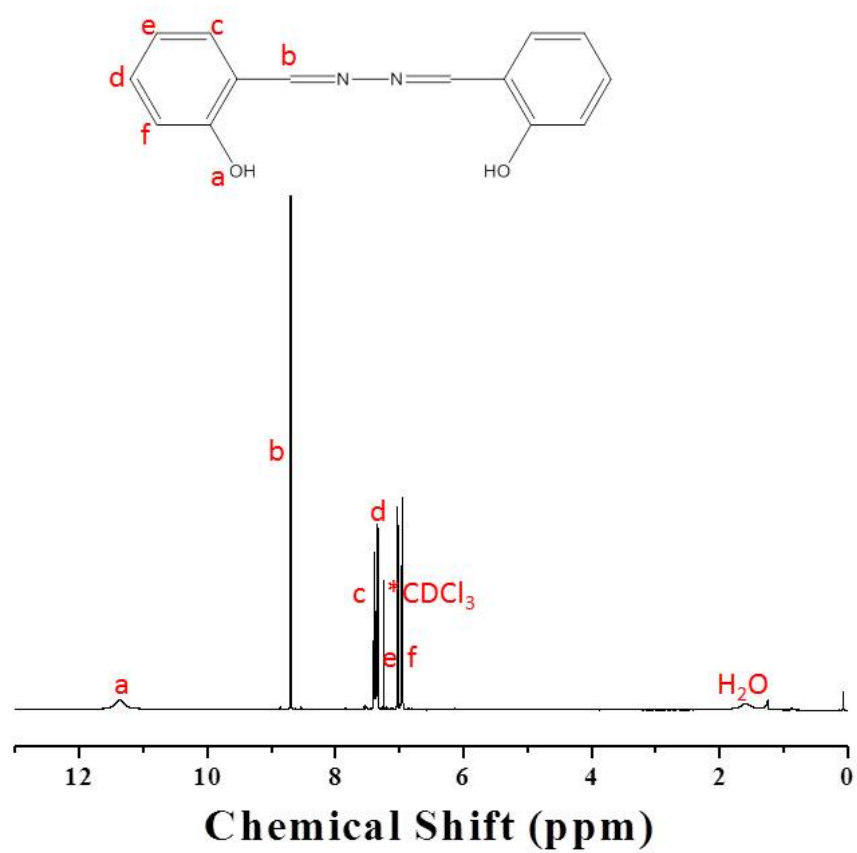

**Figure S3** <sup>1</sup>H NMR of CN2OH (CDCl<sub>3</sub>).

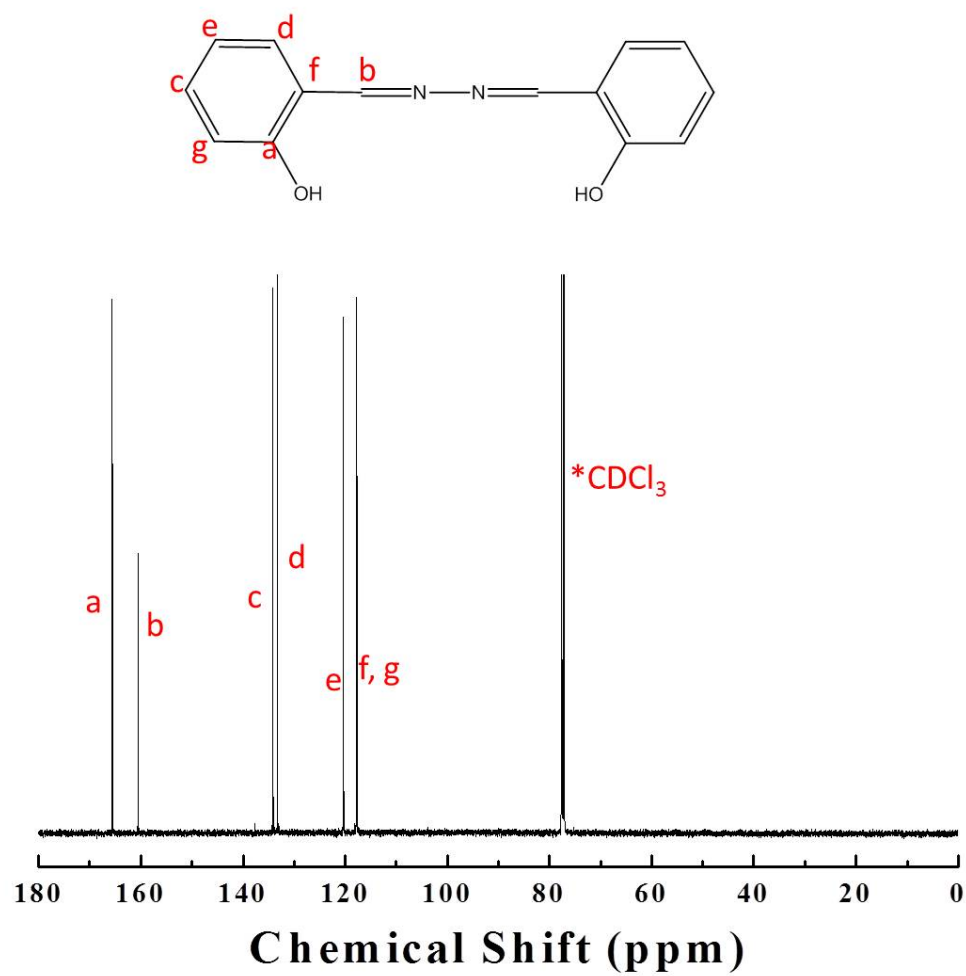

**Figure S4** <sup>13</sup>C NMR of CN2OH (CDCl<sub>3</sub>).

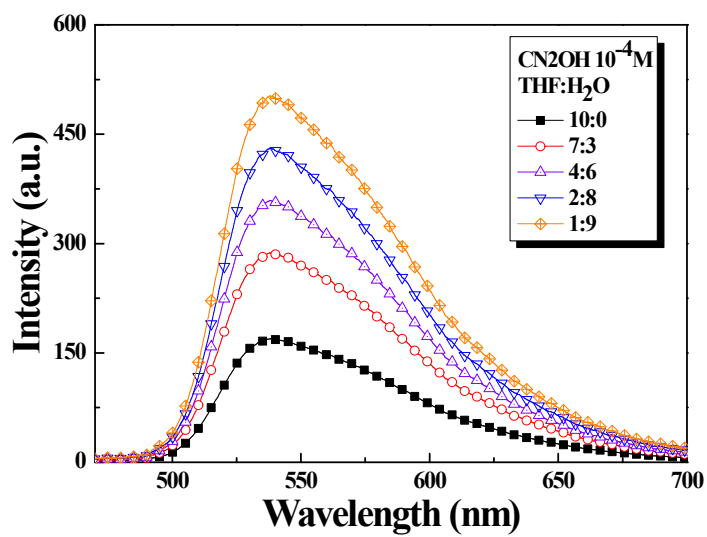

**Figure S5** Solution ( $10^{-4}$  M) PL emission spectra of CN<sub>2</sub>OH in THF containing different amounts of water ( $\lambda_{\text{ex}} = 360$  nm).



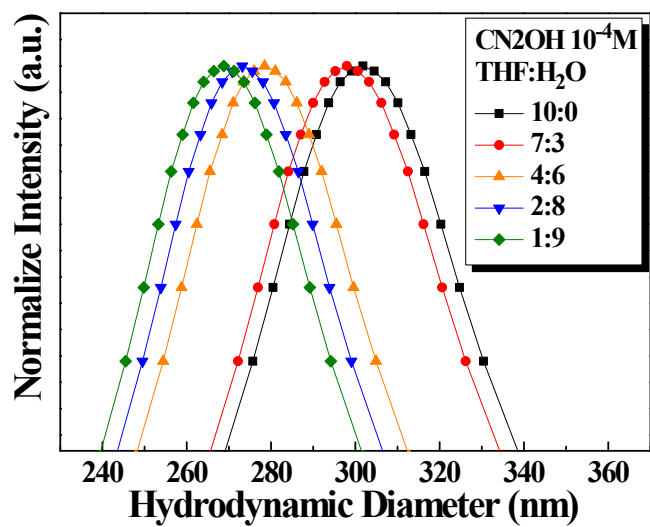

**Figure S6** Histograms of hydrodynamic diameters of CN2OH in THF containing different amounts of water.

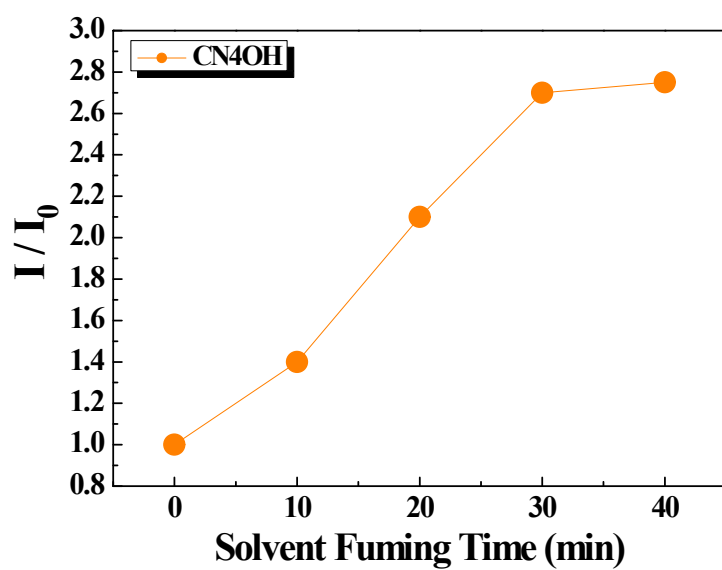

**Figure S7** Variation of the emission intensity ratio  $I/I_0$  during solvent-annealing of CN4OH ( $I$  and  $I_0$  are the peak intensities after and before solvent-annealing, respectively) (excited at 365 nm).

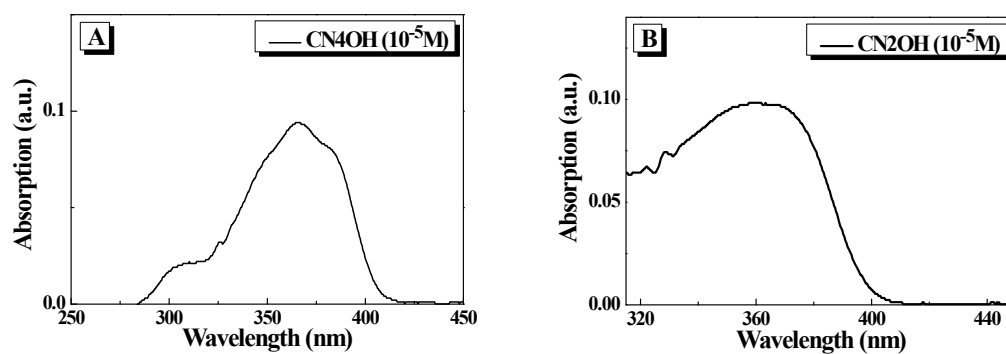

**Figure S8** Solution UV-Vis spectra of (A) CN4OH ( $10^{-5}$  M) and (B) CN2OH ( $10^{-5}$  M) in THF.
